# Supplementary material
Source: Springer Nature journal article supplement (https://www.springermedizin.de/resource/supplementary/12885_2014_5177_MOESM2_ESM.pdf/9468490)
Supplement: MOESM2 [file 9468490]

**Supplementary Table 2.** Enriched KEGG pathways of predicted targets for the four miRNAs (miR-216a, miR217, miR129-5p and miR-203) in cluster 1.

| KEGG pathway                                     | P value | Number of genes | Genes                                                                                                                                                                                                                                                                                                                                                                                                       |
|--------------------------------------------------|---------|-----------------|-------------------------------------------------------------------------------------------------------------------------------------------------------------------------------------------------------------------------------------------------------------------------------------------------------------------------------------------------------------------------------------------------------------|
| Glycosaminoglycan biosynthesis - heparan sulfate | 4.6E-13 | 6               | EXT1, EXTL2, HS2ST1, HS3ST3B1, NDST3, XYLT1                                                                                                                                                                                                                                                                                                                                                                 |
| TGF-beta signaling pathway                       | 1.3E-04 | 20              | ACVR1, ACVR2A, ACVR2B, BMPR2, CREBBP, CUL1, EP300, ID4, MAPK1, RBL2, ROCK1, RPS6KB1, SMAD2, SMAD5, SMAD7, SMAD9, SP1, TGFB2, XPNPEP3, ZFYVE16                                                                                                                                                                                                                                                               |
| Adipocytokine signaling pathway                  | 1.4E-04 | 19              | ACSL3, G6PC, IKBKB, IRS1, IRS2, JAK2, LEPR, MAPK8, MAPK9, NFKBIA, PPARA, PPARGC1A, PRKAA1, PRKAA2, PRKAB1, PRKAB2, PRKAG2, PTPN11, SOCS3                                                                                                                                                                                                                                                                    |
| Fatty acid metabolism                            | 3.4E-04 | 6               | ACADSB, ACOX1, ACSL3, ADH1B, EHHADH, HADHB                                                                                                                                                                                                                                                                                                                                                                  |
| ErbB signaling pathway                           | 5.7E-04 | 24              | ABL2, BTC, CAMK2B, ERBB4, JUN, KRAS, MAP2K4, MAPK1, MAPK8, MAPK9, NRG2, NRG3, NRG4, PAK2, PAK7, PIK3CA, PIK3R1, PRKCB, RPS6KB1, SHC4, SOS1, SOS2, SRC, STAT5B                                                                                                                                                                                                                                               |
| Neurotrophin signaling pathway                   | 5.7E-04 | 32              | BDNF, CALM1, CAMK2B, CAMK4, FOXO3, IKBKB, IRS1, IRS2, JUN, KRAS, MAP3K1, MAP3K5, MAPK1, MAPK8, MAPK9, NFKBIA, NTRK2, NTRK3, PIK3CA, PIK3R1, PTPN11, RAP1A, RAP1B, RAPGEF1, RPS6KA5, SHC4, ,OS1, SOS2, YWHAB, YWHAG, YWHAQ, ZNF274                                                                                                                                                                           |
| Wnt signaling pathway                            | 8.5E-04 | 34              | APC, CACYBP, CAMK2B, CCND1, CREBBP, CSNK1A1L, CTBP2, CUL1, CXXC4, DAAM1, DKK1, DKK2, EP300, FZD4, FZD6, JUN, MAP3K7, MAPK8, MAPK9, NFAT5, NLK, PPP3CA, PRICKLE2, PRKCB, ROCK1, SIAH1, SMAD2, BL1X, TCF7, TCF7L2, VANGL2, WNT3, WNT5A, XPNPEP3                                                                                                                                                               |
| Focal adhesion                                   | 8.5E-04 | 43              | ACTN1, ACTN4, ARHGAP5, CAV2, CCND1, COL1A1, COL4A1, COL4A4, COL5A1, FN1, HGF, IGF1, IGF1R, ITGA1, ITGA2, ITGA6, ITGB6, JUN, LAMA4, MAPK1, MAPK8, MAPK9, MYLK3, PAK2, PAK7, PDGFD, PIK3CA, IK3R1, PPP1R12A, PRKCB, PXN, RAP1A, RAP1B, RAPGEF1, ROCK1, SHC4, SOS1, SOS2, SRC, TLN1, TNC, VAV3, XIAP                                                                                                           |
| Glioma                                           | 1.4E-03 | 15              | CALM1, CAMK2B, CCND1, CDK6, E2F3, IGF1, IGF1R, KRAS, MAPK1, PIK3CA, PIK3R1, PRKCB, SHC4, SOS1, SOS2                                                                                                                                                                                                                                                                                                         |
| Pathways in cancer                               | 1.4E-03 | 59              | APC, APPL, ARNT, BRCA2, CCDC6, CCND1, CDK6, COL4A1, COL4A4, CREBBP, CTBP2, E2F3, EP300, ETS1, EVI1, FGF13, FGF2, FGFR2, FN1, FZD4, FZD6, GLI3, HDAC2, HGF, IGF1, IGF1R, IKBKB, ITGA2, ITGA6, JUN, KITLG, RAS, LAMA4, MAPK1, MAPK8, MAPK9, NFKBIA, PIK3CA, PIK3R1, PLD1, PRKCB, PTCH1, RALGDS, RASSF5, RUNX1, RUNX1T1, SMAD2, SOS1, SOS2, STAT5B, TCF7, TCF7L2, TGFB2, TPM3, TPR, WNT3, WNT5A, XIAP, XPNPEP3 |
| Type II diabetes mellitus                        | 3.4E-03 | 13              | CACNA1A, CACNA1B, CACNA1C, IKBKB, IRS1, IRS2, MAPK1, MAPK8, MAPK9, PIK3CA, PIK3R1, PRKCE, SOCS3                                                                                                                                                                                                                                                                                                             |
| Taurine and hypotaurine metabolism               | 3.8E-03 | 4               | C10orf22, CSAD, GAD1, GAD2                                                                                                                                                                                                                                                                                                                                                                                  |
| Renal cell carcinoma                             | 5.3E-03 | 19              | ARNT, CREBBP, EP300, ETS1, HGF, JUN, KRAS, MAPK1, PAK2, PAK7, PIK3CA, PIK3R1, PTPN11, RAP1A, RAP1B, RAPGEF1, SOS1, SOS2, XPNPEP3                                                                                                                                                                                                                                                                            |

|                                                        |         |    |                                                                                                                                                                                                                                            |
|--------------------------------------------------------|---------|----|--------------------------------------------------------------------------------------------------------------------------------------------------------------------------------------------------------------------------------------------|
| ECM-receptor interaction                               | 8.0E-03 | 13 | CD47, COL1A1, COL4A1, COL4A4, COL5A1, FN1, ITGA1, ITGA2, ITGA6, ITGB6, LAMA4, SV2B, TNC                                                                                                                                                    |
| Chronic myeloid leukemia                               | 8.3E-03 | 19 | CCND1, CDK6, CTBP2, E2F3, EVI1, HDAC2, IKBKB, KRAS, MAPK1, NFKBIA, PIK3CA, PIK3R1, PTPN11, RUNX1, SHC4, SOS1, SOS2, STAT5B, TGFB2                                                                                                          |
| Colorectal cancer                                      | 1.5E-02 | 15 | APC, APPL, CCND1, JUN, KRAS, MAPK1, MAPK8, MAPK9, PIK3CA, PIK3R1, RALGDS, SMAD2, TCF7, TCF7L2, TGFB2                                                                                                                                       |
| Non-small cell lung cancer                             | 1.6E-02 | 12 | CCND1, CDK6, E2F3, FOXO3, KRAS, MAPK1, PIK3CA, PIK3R1, PRKCB, RASSF5, SOS1, SOS2                                                                                                                                                           |
| Acute myeloid leukemia                                 | 2.0E-02 | 14 | CCND1, IKBKB, KRAS, MAPK1, PIK3CA, PIK3R1, RPS6KB1, RUNX1, RUNX1T1, SOS1, SOS2, STAT5B, TCF7, TCF7L2                                                                                                                                       |
| Aldosterone-regulated sodium reabsorption              | 2.1E-02 | 12 | ATP1B1, ATP1B3, IGF1, IRS1, IRS2, KRAS, MAPK1, NEDD4L, NR3C2, PIK3CA, PIK3R1, PRKCB                                                                                                                                                        |
| GnRH signaling pathway                                 | 2.3E-02 | 21 | ADCY2, CACNA1C, CALM1, CAMK2B, GNAS, GNRHR, ITPR1, ITPR2, JUN, KRAS, MAP2K4, MAP3K1, MAP3K2, MAPK1, MAPK8, MAPK9, PLD1, PRKCB, SOS1, SOS2, SRC                                                                                             |
| B cell receptor signaling pathway                      | 2.5E-02 | 17 | BCL10, CR2, DAPP1, IKBKB, JUN, KRAS, LILRA6, MAPK1, NFAT5, NFKBIA, PIK3CA, PIK3R1, PPP3CA, PRKCB, SOS1, SOS2, VAV3                                                                                                                         |
| Prostate cancer                                        | 3.0E-02 | 20 | CCND1, CREB3L2, CREB5, CREBBP, E2F3, EP300, FGFR2, IGF1, IGF1R, IKBKB, KRAS, MAPK1, NFKBIA, PDGFD, PIK3CA, PIK3R1, SOS1, SOS2, TCF7, TCF7L2                                                                                                |
| Insulin signaling pathway                              | 3.1E-02 | 27 | CALM1, EIF4E2, G6PC, IKBKB, IRS1, IRS2, KRAS, MAPK1, MAPK8, MAPK9, PIK3CA, PIK3R1, PPARGC1A, PPP1R3D, PRKAA1, PRKAA2, PRKAB1, PRKAB2, PRKAG2, RAPGEF1, RHOQ, RPS6KB1, SHC4, SOCS3, SORBS1, SOS1, SOS2                                      |
| mRNA surveillance pathway                              | 3.5E-02 | 15 | CPSF2, CSTF2T, ETF1, HBS1L, NUDT21, NXT2, PABPC1L, PABPC1L2A, PABPC3, PABPC5, PABPCP5, PABPN1, PAPOLA, PPP2R3A, UPF2                                                                                                                       |
| Arrhythmogenic right ventricular cardiomyopathy (ARVC) | 3.7E-02 | 16 | ACTN1, ACTN4, CACNA1C, CACNB4, CACNG2, CDH2, DMD, ITGA1, ITGA2, ITGA6, ITGB6, PKP2, RYR2, SGCD, TCF7, TCF7L2                                                                                                                               |
| Long-term potentiation                                 | 3.7E-02 | 16 | CACNA1C, CALM1, CAMK2B, CAMK4, CREBBP, EP300, GRIN2A, ITPR1, ITPR2, KRAS, MAPK1, PPP1R12A, PPP3CA, PRKCB, RAP1A, RAP1B                                                                                                                     |
| Adherens junction                                      | 3.8E-02 | 18 | ACTN1, ACTN4, CREBBP, EP300, IGF1R, LMO7, MAP3K7, MAPK1, NLK, PTPRB, PVRL3, SMAD2, SNAI2, SORBS1, SRC, TCF7, TCF7L2, TGFB2                                                                                                                 |
| Endocytosis                                            | 4.7E-02 | 33 | ACAP2, AP2B1, ASAP1, ASAP2, CAV2, CCR5, CHMP2B, CLTC, DAB2, DNAJC6, DNM3, EEA1, ERBB4, FGFR2, IGF1R, IQSEC3, NEDD4L, PDCD6IP, PLD1, PSD3, RAB11A, RAB22A, RAB4A, SH3GLB1, SH3KBP1, SMAD2, SMAD7, SRC, TGFB2, USP8, VPS24, ZFYVE16, ZFYVE20 |
